# Supplementary material for: ZMAT3 hypomethylation contributes to early senescence of preadipocytes from healthy first‐degree relatives of type 2 diabetics
Source: PubMed Central journal article supplement (PMC8920444; doi:10.1111/acel.13557), 2022-02-11
Supplement: ACEL-21-e13557-s011.pdf [file ACEL-21-e13557-s011.pdf]

**Table S3. Characteristics of subjects in the discovery cohort stratified according to *ZMAT3* mRNA expression in subcutaneous adipose cells.**

| <b><i>Phenotypes</i></b>              | <b><i>High ZMAT3 mRNA expression</i></b> | <b><i>Low ZMAT3 mRNA expression</i></b> | <b><i>p value</i></b> |
|---------------------------------------|------------------------------------------|-----------------------------------------|-----------------------|
| <b>N</b>                              | 14                                       | 15                                      |                       |
| <b><i>ZMAT3</i> mRNA levels (REU)</b> | 0.52 [0.39; 0.64]                        | 0.21 [0.18; 0.31]                       | <i>&lt;0.0001</i>     |
| <b><i>TP53</i> mRNA levels (REU)</b>  | 0.53 [0.38; 0.91]                        | 0.26 [0.19; 0.35]                       | <i>&lt;0.0001</i>     |
| <b>Age, years</b>                     | 59.0 [32.8; 62.5]                        | 45.0 [32.0; 47.0]                       | <i>0.0150</i>         |
| <b>T2D: N (%)</b>                     | 10 (71%)                                 | 0 (0%)                                  | <i>&lt;0.0001</i>     |
| <b>BMI, Kg/m<sup>2</sup></b>          | 33.2 [30.5;35.0]                         | 26.6 [23.1; 29.2]                       | <i>&lt;0.0001</i>     |

Clinical study participants were stratified according to *ZMAT3* mRNA expression in subcutaneous adipose cells into two categories, low ( $L_{exp}$ ) and high ( $H_{exp}$ ) expression, defined by values below or above the median, respectively. Study participants are expressed as number (N). Data are shown as median [first quartile-Q1; third quartile-Q3]. Statistical differences between the two groups were tested using Mann Whitney test (continuous variables) or Fisher's exact test (categorical variable). *p* value vs  $L_{exp}$  participants.

REU, relative expression units; BMI, body mass index; T2D, Type 2 Diabetes.
